# Supplementary material for: Fas (CD95) expression in myeloid cells promotes obesity-induced muscle insulin resistance
Source: PubMed Central journal article supplement (PMC3936487; doi:10.1002/emmm.201302962), 2013-11-06
Supplement: emmm0006-0043-sd2.pdf [file emmm0006-0043-sd2.pdf]

## Supplemental Figure 1

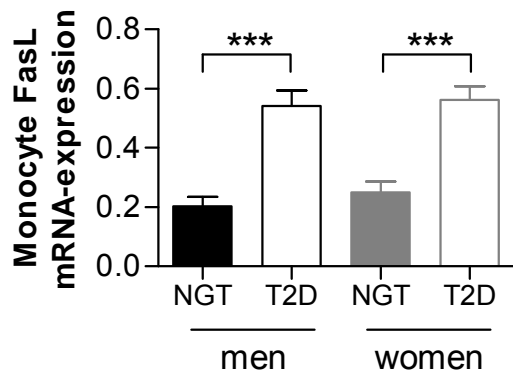

### FasL expression in circulating human monocytes

Monocytes were isolated from whole human blood samples and FasL mRNA expression was measured normalized to HPRT. \*\*\* $p < 0.0001$  (Student's *t*-test). NGT: normal glucose tolerance (men  $n=61$ ; women  $n=70$ ); T2D: type 2 diabetes (men  $n=57$ ; women  $n=58$ ). Error bars represent SEM.
