# Supplementary material for: Fas (CD95) expression in myeloid cells promotes obesity-induced muscle insulin resistance
Source: PubMed Central journal article supplement (PMC3936487; doi:10.1002/emmm.201302962), 2013-11-06
Supplement: emmm0006-0043-sd3.pdf [file emmm0006-0043-sd3.pdf]

## Supplemental Figure 2

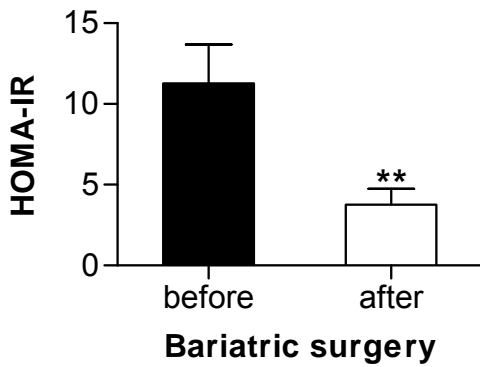

### **Improved insulin sensitivity HOMA-IR after bariatric surgery**

HOMA-IR was determined in obese patients before and six months after bariatric surgery (gastric sleeve resection) (n=14), \*\*p = 0.008 (Student's *t*-test). Error bars represent SEM.
