# Supplementary material for: Fas (CD95) expression in myeloid cells promotes obesity-induced muscle insulin resistance
Source: PubMed Central journal article supplement (PMC3936487; doi:10.1002/emmm.201302962), 2013-11-06
Supplement: emmm0006-0043-sd4.pdf [file emmm0006-0043-sd4.pdf]

## Supplemental Figure 3

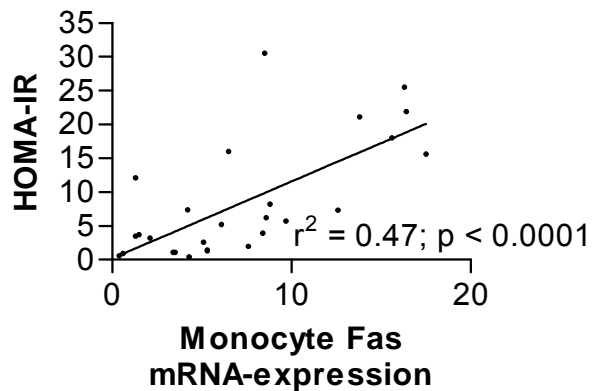

### **Positive correlation of monocytic Fas with HOMA-IR in the bariatric surgery group at baseline**

Monocytes were isolated from whole human blood samples. Fas mRNA expression was measured, normalized to HPRT and correlated with HOMA-IR in the bariatric surgery group (baseline and after intervention; n=27).
