# Supplementary material for: Fas (CD95) expression in myeloid cells promotes obesity-induced muscle insulin resistance
Source: PubMed Central journal article supplement (PMC3936487; doi:10.1002/emmm.201302962), 2013-11-06
Supplement: emmm0006-0043-sd5.pdf [file emmm0006-0043-sd5.pdf]

# Supplemental Figure 4

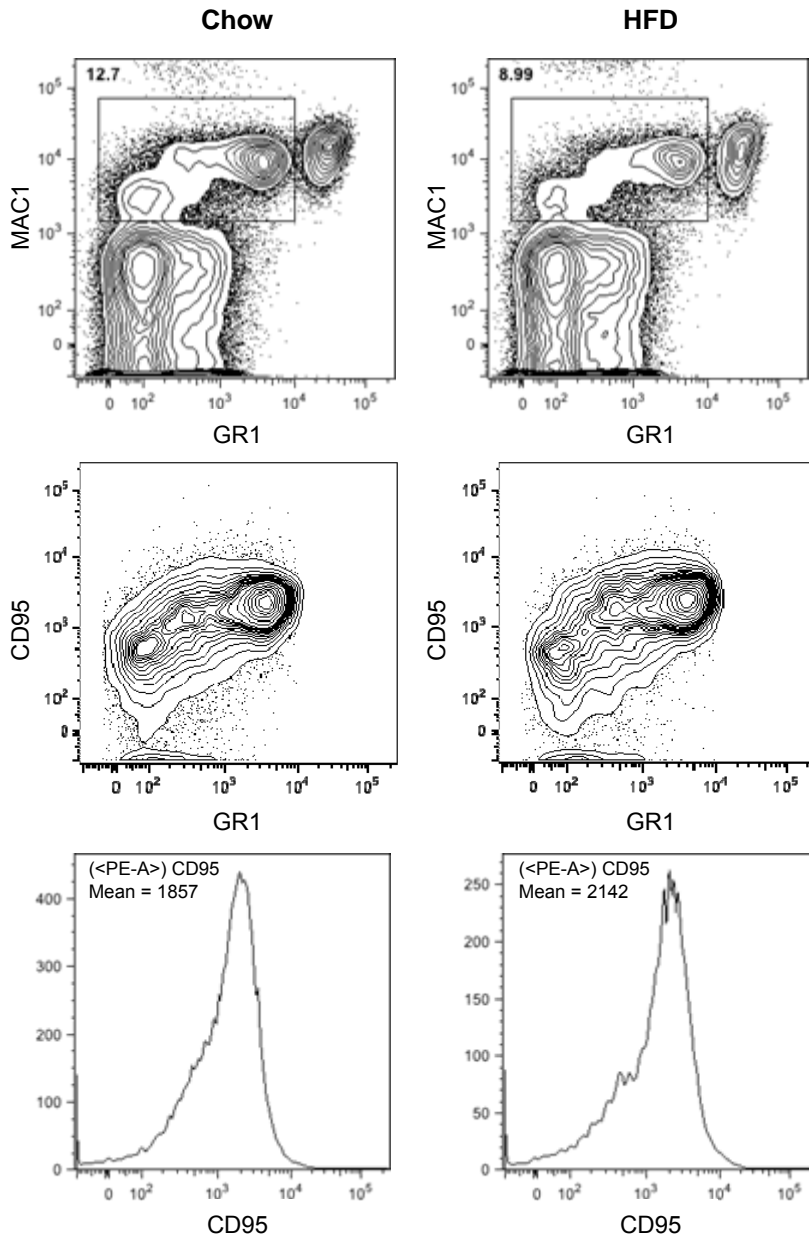

## Flow cytometric analysis in chow- and HFD-fed C57BL6/J mice

Flow cytometric analysis of peripheral blood leukocytes of chow- and HFD-fed mice. Monocytes (GR1<sup>low/im</sup> MAC1<sup>+</sup>) were stained with respective antibodies and contour plots were gated on live cells. Inset is the percentage of cells within the GR1<sup>low/im</sup> Mac1<sup>+</sup> gate.
