# Supplementary material for: Fas (CD95) expression in myeloid cells promotes obesity-induced muscle insulin resistance
Source: PubMed Central journal article supplement (PMC3936487; doi:10.1002/emmm.201302962), 2013-11-06
Supplement: emmm0006-0043-sd6.pdf [file emmm0006-0043-sd6.pdf]

## Supplemental Figure 5

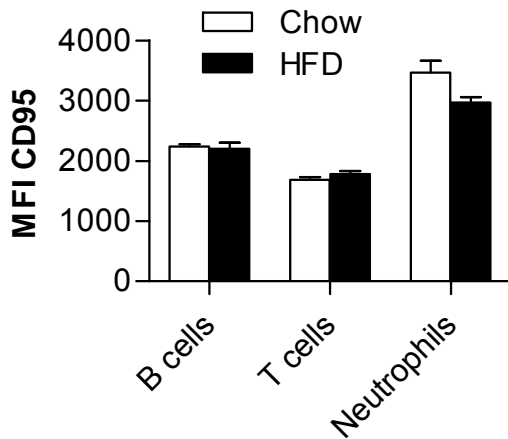

**Flow cytometric analysis of peripheral blood leukocytes of chow- and HFD-fed mice.** B-cell (B220+), T-cell (CD3e+) and neutrophils (GR1hi MAC1+) were stained with respective antibodies. Bar graphs show mean fluorescence intensity (MFI) of Fas (CD95) of live cells. n=6-8. Error bars represent SEM.
