# Supplementary material for: Fas (CD95) expression in myeloid cells promotes obesity-induced muscle insulin resistance
Source: PubMed Central journal article supplement (PMC3936487; doi:10.1002/emmm.201302962), 2013-11-06
Supplement: emmm0006-0043-sd7.pdf [file emmm0006-0043-sd7.pdf]

# Supplemental Figure 6

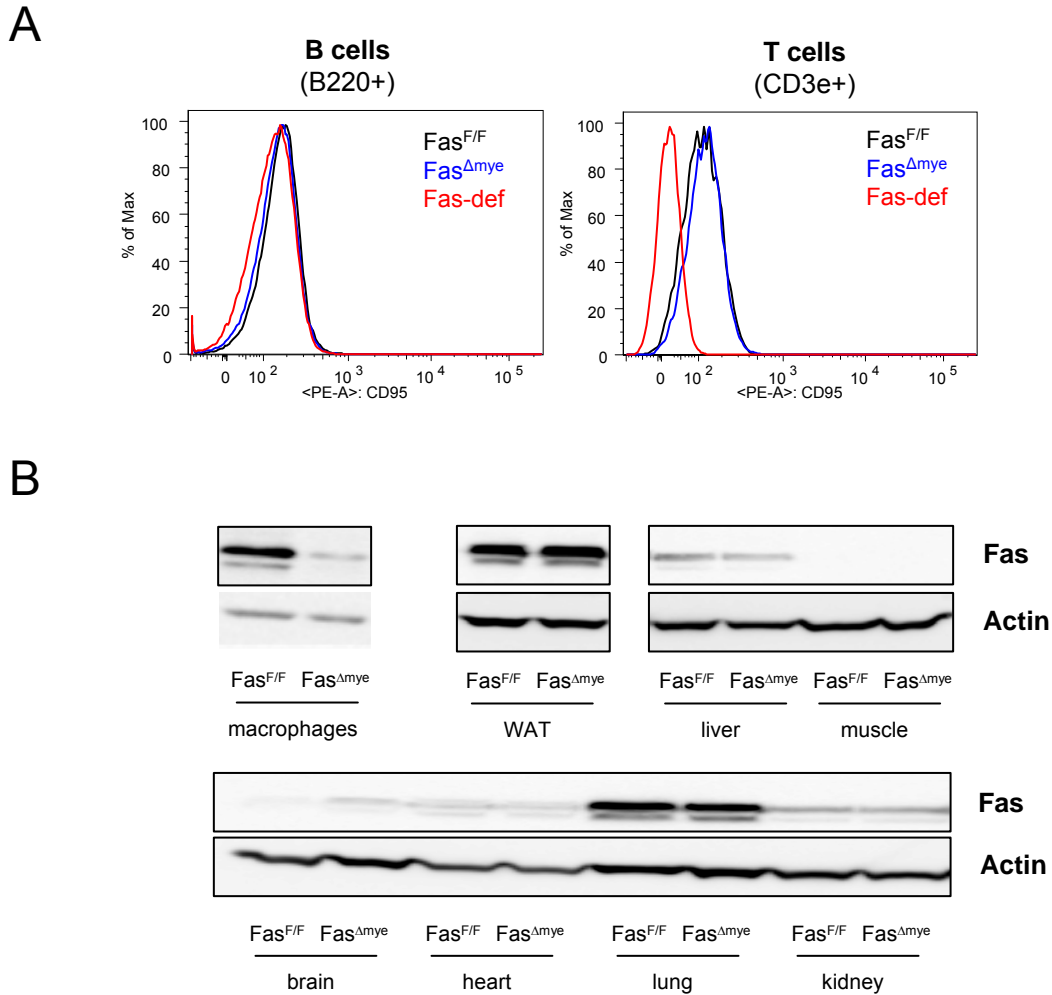

## Fas expression in Fas<sup>F/F</sup> and Fas<sup>Δmye</sup> mice

(A) Flow cytometric analysis of peripheral blood leukocytes of Fas-deficient, Fas<sup>F/F</sup> and Fas<sup>Δmye</sup> mice. Cells were stained with respective antibodies and Fas fluorescence was measured. (B) Western blot analysis of Fas protein levels in respective tissues of Fas<sup>F/F</sup> and Fas<sup>Δmye</sup> mice.
