# Supplementary material for: Fas (CD95) expression in myeloid cells promotes obesity-induced muscle insulin resistance
Source: PubMed Central journal article supplement (PMC3936487; doi:10.1002/emmm.201302962), 2013-11-06
Supplement: emmm0006-0043-sd9.pdf [file emmm0006-0043-sd9.pdf]

## Supplemental Figure 8

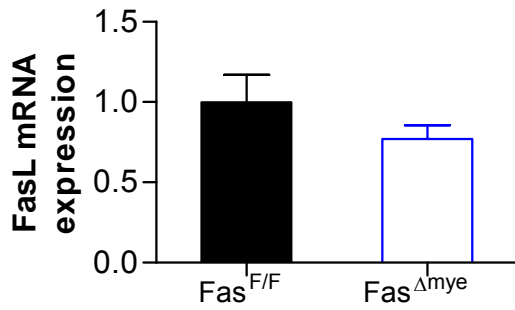

### Similar FasL expression in blood leukocytes of HFD-fed mice

Leukocyte-mRNA expression of FasL in HFD-fed Fas<sup>F/F</sup> and Fas<sup>Δmye</sup> mice. n=3-5. Error bars represent SEM.
