# Supplementary material for: Fas (CD95) expression in myeloid cells promotes obesity-induced muscle insulin resistance
Source: PubMed Central journal article supplement (PMC3936487; doi:10.1002/emmm.201302962), 2013-11-06
Supplement: emmm0006-0043-sd10.pdf [file emmm0006-0043-sd10.pdf]

# Supplemental Figure 9

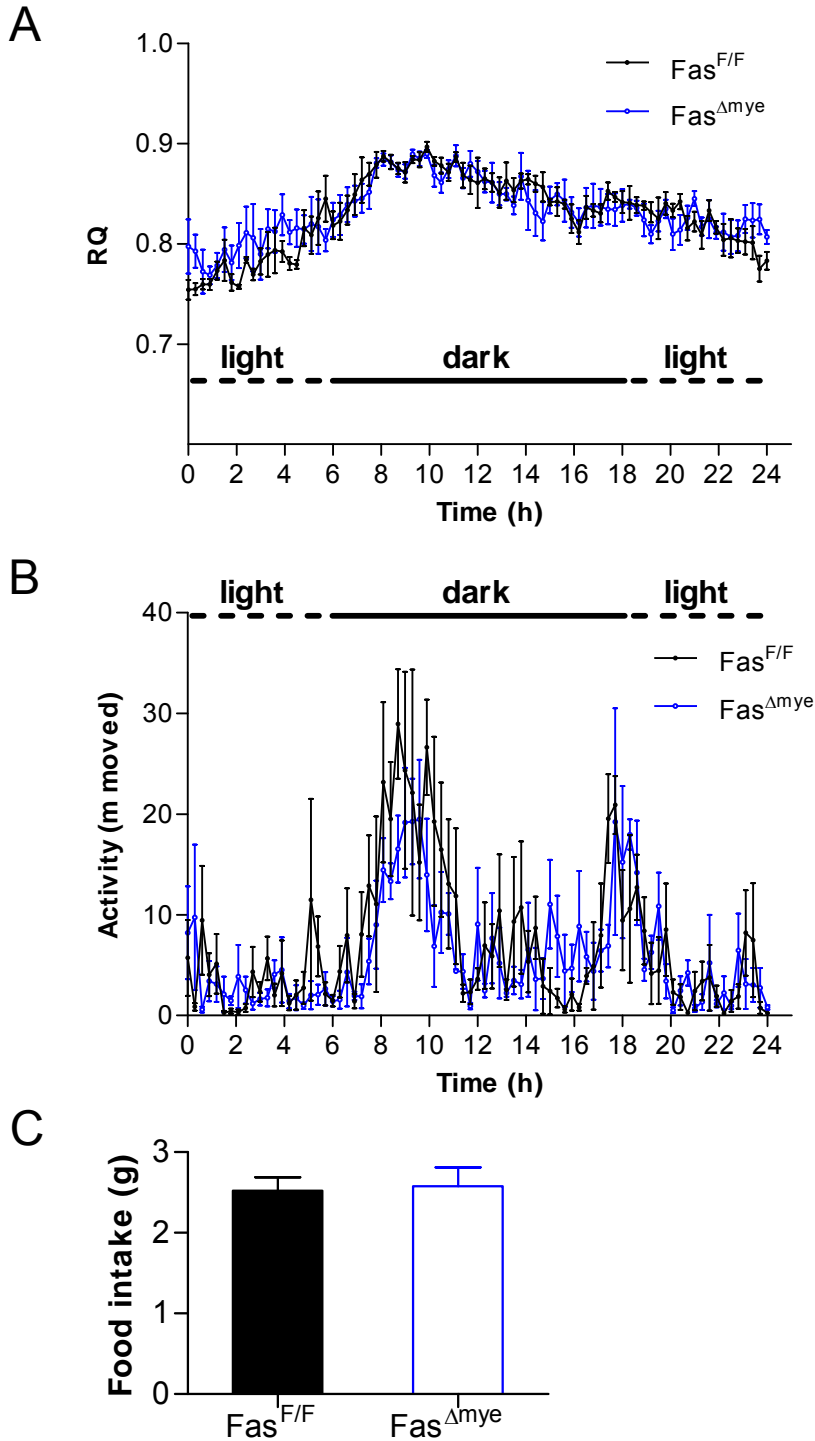

## Similar respiratory quotient, locomotor activity and food intake in $Fas^{F/F}$ and $Fas^{\Delta mye}$ mice

(A and B) Respiratory quotient (RQ) and activity was determined in metabolic cages in HFD-fed  $Fas^{F/F}$  and  $Fas^{\Delta mye}$  mice.  $n=4$ . (C) Food intake was measured in metabolic cages in  $Fas^{F/F}$  (black bar) and  $Fas^{\Delta mye}$  (blue bar) mice.  $n=3-4$ . Error bars represent SEM.
