# Supplementary material for: Fas (CD95) expression in myeloid cells promotes obesity-induced muscle insulin resistance
Source: PubMed Central journal article supplement (PMC3936487; doi:10.1002/emmm.201302962), 2013-11-06
Supplement: emmm0006-0043-sd12.pdf [file emmm0006-0043-sd12.pdf]

## Supplemental Figure 11

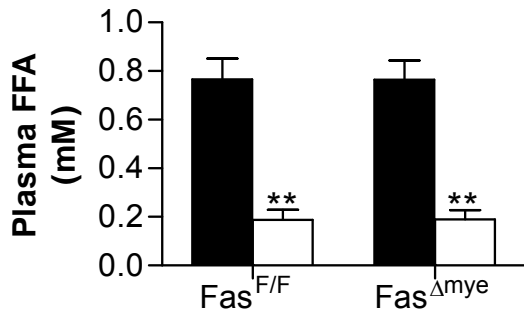

### Similar plasma FFA levels during hyperinsulinemic-euglycemic clamp

Plasma FFA levels in the basal state (black bars) and after insulin infusion (white bars) in HFD-fed Fas<sup>F/F</sup> and Fas<sup>Δmye</sup> mice. n=4-5. \*\*p = 0.003 (Fas<sup>F/F</sup>) and \*\*p = 0.006 (Fas<sup>Δmye</sup>) (Student's *t*-test). Error bars represent SEM.
