# Supplementary material for: Fas (CD95) expression in myeloid cells promotes obesity-induced muscle insulin resistance
Source: PubMed Central journal article supplement (PMC3936487; doi:10.1002/emmm.201302962), 2013-11-06
Supplement: emmm0006-0043-sd14.pdf [file emmm0006-0043-sd14.pdf]

# Supplemental Figure 13

## A

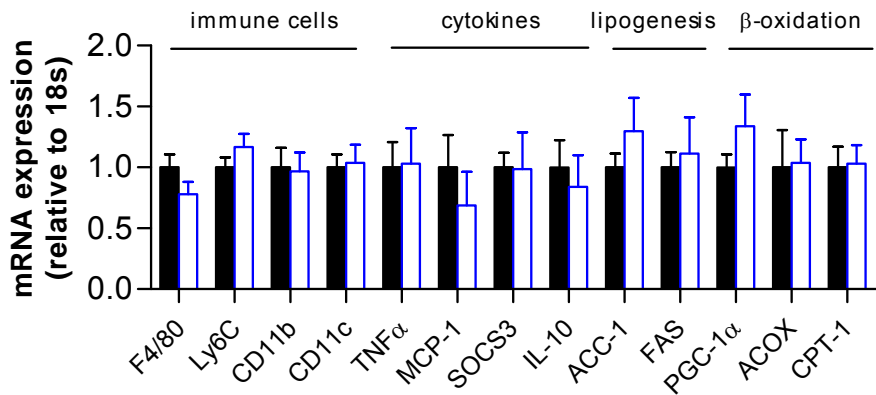

## B

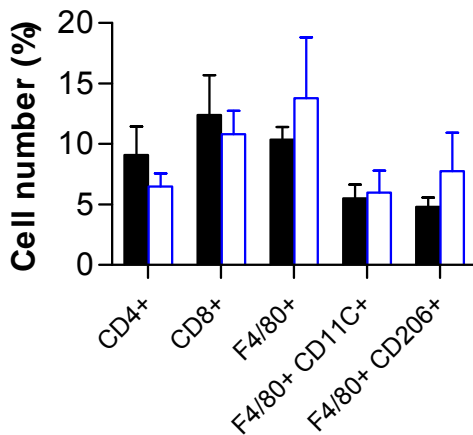

### mRNA expression and flow cytometric analysis of skeletal muscle from Fas<sup>F/F</sup> and Fas<sup>Δmye</sup> mice

(A) mRNA expression of respective genes in skeletal muscle of HFD-fed Fas<sup>F/F</sup> (black bars) and Fas<sup>Δmye</sup> (blue bars) mice. n=6-10. (B) Flow cytometric analysis of skeletal muscle cells of Fas<sup>F/F</sup> (black bars) and Fas<sup>Δmye</sup> (blue bars) mice. Cells were stained with respective antibodies and fluorescence was measured. n=5. All error bars represent SEM.
