# Supplementary material for: Fas (CD95) expression in myeloid cells promotes obesity-induced muscle insulin resistance
Source: PubMed Central journal article supplement (PMC3936487; doi:10.1002/emmm.201302962), 2013-11-06
Supplement: emmm0006-0043-sd16.pdf [file emmm0006-0043-sd16.pdf]

# Supplemental Figure 15

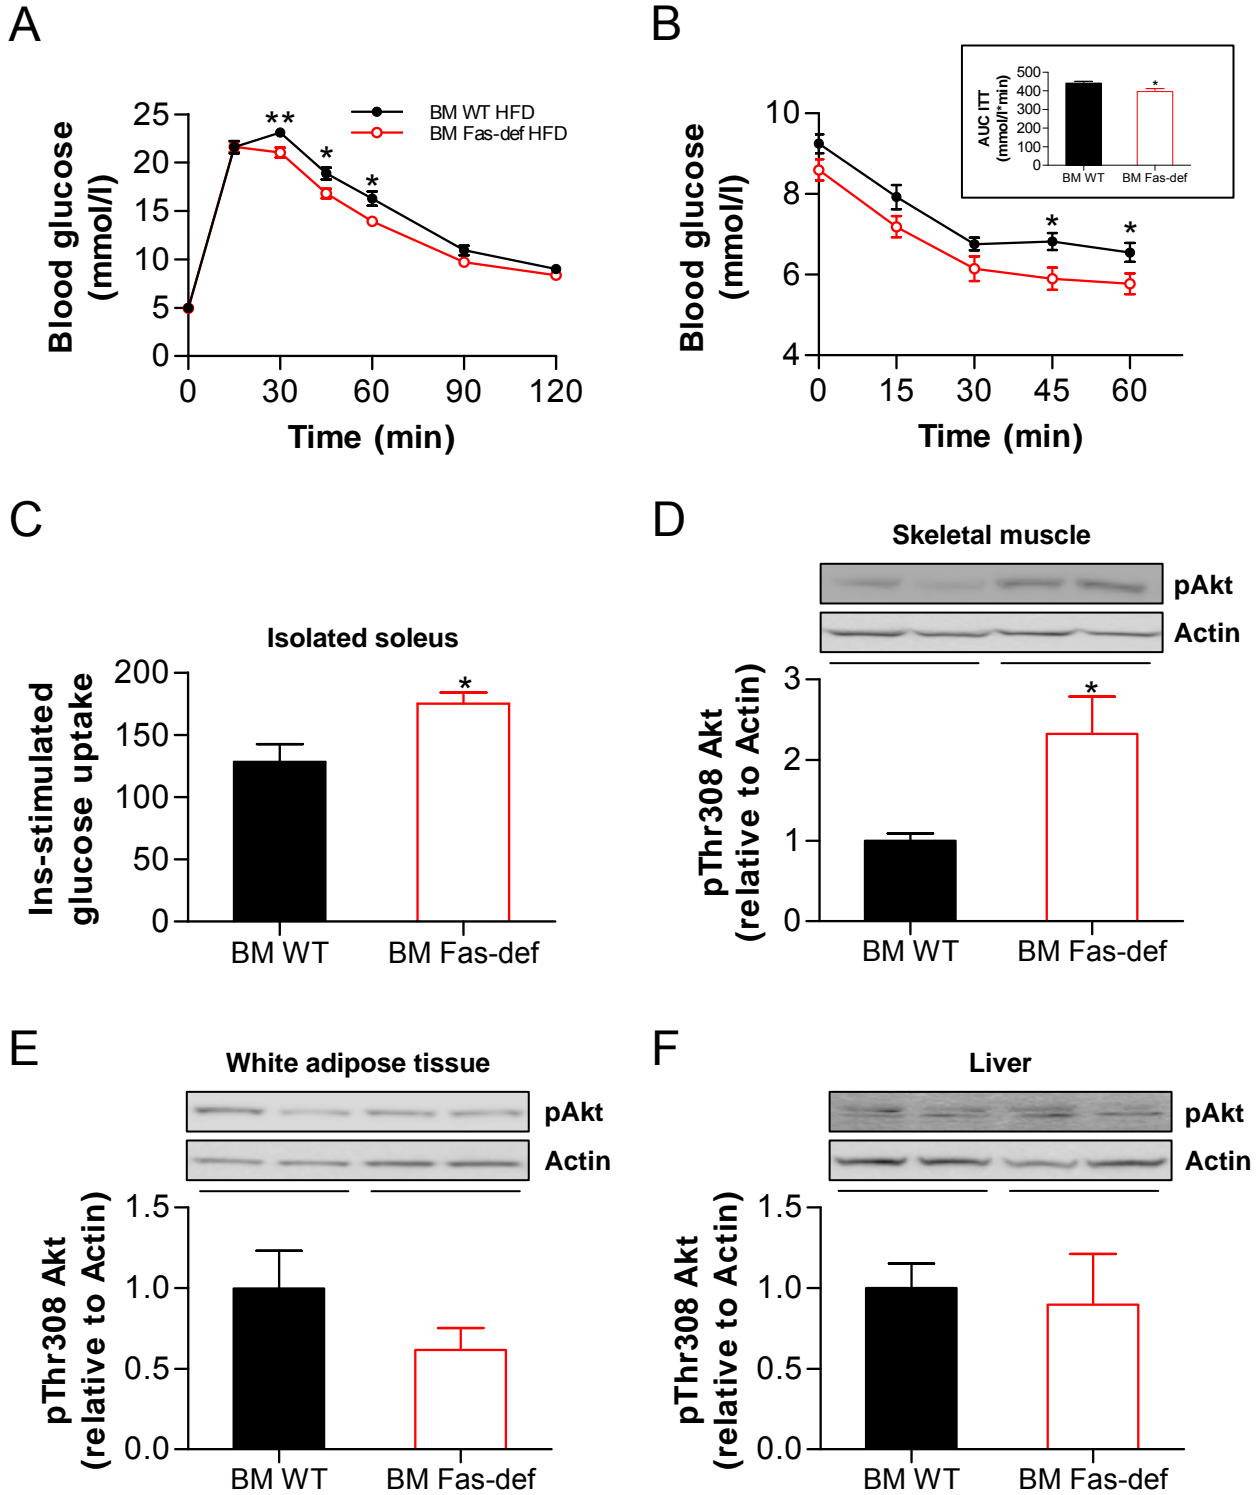

## Improved skeletal muscle insulin sensitivity in HFD-fed BM Fas-def compared to BM WT mice

(A) Intra-peritoneal glucose-tolerance test in HFD-fed BM WT and BM Fas-def mice.  $n=11-12$ ,  $*p = 0.017$  and  $0.013$  (after 45 min and 60 min, respectively),  $**p = 0.005$  (Student's  $t$ -test). Error bars represent SEM. (B) Intra-peritoneal insulin-tolerance test.  $n=9-12$ . Inserted

graphs depict the respective analysis of the area under the curve. \*p = 0.014, 0.040 and 0.021 (after 45 min, 60 min and for area under the curve, respectively) (Student's *t*-test). (C) Insulin-stimulated glucose uptake in isolated soleus muscle relative to basal uptake. n=4-5, \*p = 0.036 (Student's *t*-test). (D to F) Representative Western blots of total lysates of BM WT and BM Fas-def mice. Graphs show results of 3-4 mice. \*p = 0.022 (Student's *t*-test). All error bars represent SEM.
