# Supplementary material for: Fas (CD95) expression in myeloid cells promotes obesity-induced muscle insulin resistance
Source: PubMed Central journal article supplement (PMC3936487; doi:10.1002/emmm.201302962), 2013-11-06
Supplement: emmm0006-0043-sd17.pdf [file emmm0006-0043-sd17.pdf]

## Supplemental Figure 16

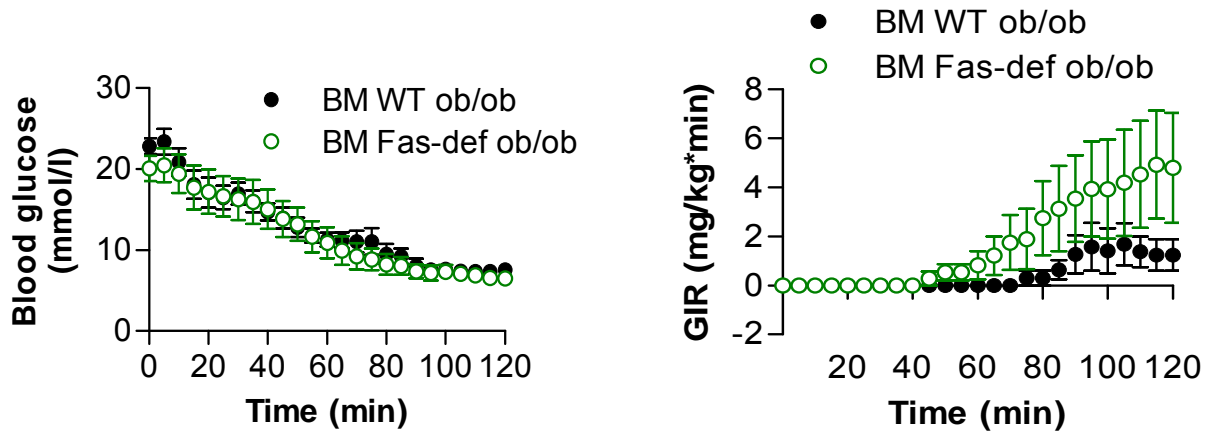

### Blood glucose concentrations and glucose infusion rates during hyperinsulinemic-euglycemic clamp

(A) Blood glucose levels were clamped upon insulin infusion at about 7-8 mmol/l in BM WT ob/ob (black circles) and BM Fas-def ob/ob (green circles) mice. (B) In order to maintain euglycemia, glucose infusion rate was adjusted over time in BM WT ob/ob (black circles) and BM Fas-def ob/ob (green circles) mice. n=5-6. Error bars represent SEM.
