# Supplementary material for: Fas (CD95) expression in myeloid cells promotes obesity-induced muscle insulin resistance
Source: PubMed Central journal article supplement (PMC3936487; doi:10.1002/emmm.201302962), 2013-11-06
Supplement: emmm0006-0043-sd18.pdf [file emmm0006-0043-sd18.pdf]

## Supplemental Figure 17

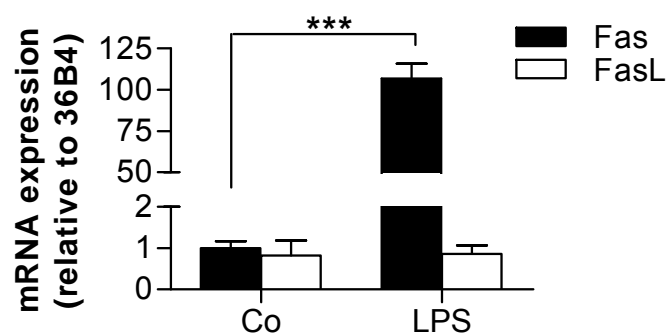

### **LPS does not increase FasL expression in RAW cells**

mRNA expression of Fas and FasL in RAW cells treated with or without LPS (100 ng/ml for 6 hours). n=3. \*\*\*p = 0.0003 (Student's *t*-test). Error bars represent SEM.
