# Supplementary material for: Fas (CD95) expression in myeloid cells promotes obesity-induced muscle insulin resistance
Source: PubMed Central journal article supplement (PMC3936487; doi:10.1002/emmm.201302962), 2013-11-06
Supplement: emmm0006-0043-sd19.pdf [file emmm0006-0043-sd19.pdf]

## Supplemental Figure 18

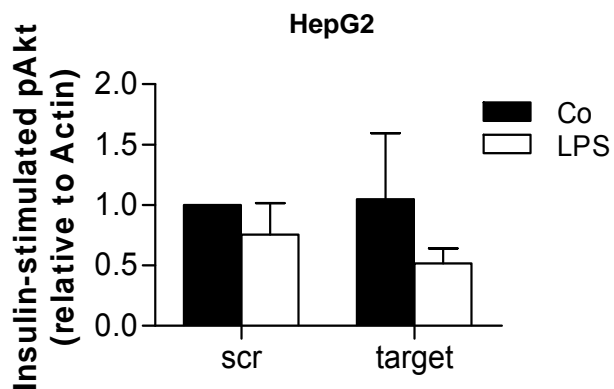

### **No effect of Fas down-regulation in RAW cells on conditioned medium-induced insulin resistance in HepG2 cells**

HepG2 cells were incubated overnight with conditioned media and then stimulated with 100 nM insulin for 10 min. Phosphorylation of Akt on Thr308 was detected by Western blot technique. n=3. Error bars represent SEM.
