# Supplementary material for: Fas (CD95) expression in myeloid cells promotes obesity-induced muscle insulin resistance
Source: PubMed Central journal article supplement (PMC3936487; doi:10.1002/emmm.201302962), 2013-11-06
Supplement: emmm0006-0043-sd21.pdf [file emmm0006-0043-sd21.pdf]

**Supplemental Table 1 Phenotypic characteristics of HFD-fed BMT mice**

|                        | BM WT        | BM Fas-def   |
|------------------------|--------------|--------------|
| Body weight (g)        | 26.8 ± 0.5   | 26.1 ± 0.4   |
| Blood glucose (mmol/l) | 10.1 ± 0.4   | 8.6 ± 0.4*   |
| Insulin (pmol/l)       | 170.5 ± 26.5 | 148.3 ± 13.4 |
| FFA (mmol/l)           | 1.06 ± 0.04  | 1.13 ± 0.09  |
| TG (mg/dl)             | 186.0 ± 10.1 | 158.4 ± 8.0  |
| Adiponectin (µg/ml)    | 52.8 ± 2.6   | 51.5 ± 2.0   |
| Leptin (pg/ml)         | 81.1 ± 8.3   | 95.2 ± 8.9   |
| TNFα (pg/ml)           | 3.6 ± 0.5    | 2.1 ± 0.2*   |
| IL-6 (pg/ml)           | 2.0 ± 0.5    | 1.5 ± 0.2    |
| MCP-1 (pg/ml)          | 6.8 ± 0.6    | 6.3 ± 0.5    |
| IL-10 (pg/ml)          | n.d.         | n.d.         |

Mice were fasted for 8 hours. Results are the means ± SEM of 7 to 8 mice. \*p < 0.05 (Student's *t* test). n.d. = not detectable.
